# Supplementary material
Source: Springer Nature journal article supplement (https://www.springermedizin.de/resource/supplementary/12902_2014_265_MOESM4_ESM.pdf/9515908)
Supplement: MOESM4 [file 9515908]

**Bibliographic search**  
2324

Duplicates

336

1988

Excluded after reading title/abstract

1386

602

Excluded after full text reading

578

**Reasons for exclusion**

|                                                                                                  |     |
|--------------------------------------------------------------------------------------------------|-----|
| 1. Comments, letters, narrative reviews                                                          | 13  |
| 2. Studies in which no intervention is included                                                  | 110 |
| 3. Interventions not targeted to ethnic minority group(s)                                        | 74  |
| 4. Not pure educational interventions                                                            | 63  |
| 5. Interventions which have not been assessed through experimental or quasi-experimental studies | 113 |
| 6. Studies not carried out in OECD countries                                                     | 203 |
| 7. Pilot studies from which final results are available in a subsequent publication              | 2   |

Articles selected

24

Search of backward and forward citations

1512

Duplicates

364

1148

Excluded after title/abstracts reading

1074

74

Excluded after full text reading

61

**Reasons for exclusion**

|                                                                                                  |    |
|--------------------------------------------------------------------------------------------------|----|
| 1. Comments, letters, narrative reviews                                                          | 7  |
| 2. Studies in which no intervention is included                                                  | 41 |
| 3. Interventions not targeted to ethnic minority group(s)                                        | 8  |
| 4. Not pure educational interventions                                                            | 3  |
| 5. Interventions which have not been assessed through experimental or quasi-experimental studies | 2  |

13

37 articles reporting on 39 interventions finally selected and qualitatively analysed

Excluded from Meta-analysis

17

20 interventions finally included in the meta-analysis
